# Supplementary material for: Resistance exercise interventions for sarcopenia and nutritional status of maintenance hemodialysis patients: a meta-analysis
Source: PeerJ. 2024 Feb 5;12:e16909. doi: 10.7717/peerj.16909 (PMC10851873; doi:10.7717/peerj.16909)
Supplement: Supplemental Information 1 [file peerj-12-16909-s001.xlsx]

## Sheet: Grip strength
		Experimental				Control
Number	First Author	Year	Mean	SD	Toal	Mean	SD	Toal
1	Song	2012	28.7	9	20	27.8	11.8	20
2	chan	2019	54	15	13	53	16	15
3	Yan	2022	31.88	5.57	47	28.52	5.74	47
4	zhang	2020	26.57	8.43	43	22.03	7.09	44
5	Tayebi	2018	16.4	3.3	17	11.3	3.7	17
6	Cai	2022	34.84	6.97	44	29.45	7.54	44
7	Dai	2021	30.88	9.51	20	24.88	9.41	30

## Sheet: Six-minute walk test
		Experimental				Control
Number	First Author	Year	Mean	SD	Toal	Mean	SD	Toal
1	chan	2019	330	80	13	313	65	15
2	Chemma	2007	513.3	173.8	24	403.5	148.7	44
3	zhang	2020	409.49	88.27	43	373.21	91.3	25

## Sheet: Muscle mass
		Experimental				Control
Number	First Author	Year	Mean	SD	Toal	Mean	SD	Toal
1	Cai	2022	34.07	3.79	44	29.54	8.79	44
2	Dai	2021	43.79	9.1	20	39.39	9.44	30

## Sheet: Hb
		Experimental				Control
Number	First Author	Year	Mean	SD	Toal	Mean	SD	Toal
1	Cai	2022	110.71	7.11	44	105.26	7.87	44
2	Dai	2021	115.85	10.3	20	117.5	8.09	30
3	Yan	2022	112.45	13.08	47	115.39	13.52	47
4	Zhu	2022	98.37	3.67	36	95.52	3.74	35

## Sheet: ALB
		Experimental				Control
Number	First Author	Year	Mean	SD	Toal	Mean	SD	Toal
1	Cai	2022	39.58	5.89	44	33.75	7.89	44
2	Dai	2021	39.82	2.29	20	38.61	2.37	30
3	Tayebi	2018	39.3	4.5	17	36.2	3.5	17
4	Yan	2022	44.57	6.53	47	41.08	6.14	47

## Sheet: Body mass index (BMI)
		Experimental				Control
Number	First Author	Year	Mean	SD	Toal	Mean	SD	Toal
1	Cai	2022	23.67	2.12	44	20.67	4.69	44
2	Chemma	2007	27.3	6.5	24	27.9	6.2	25
3	Dai	2021	24.08	4.09	20	25.67	4.71	30

## Sheet:  LDL
		Experimental				Control
Number	First Author	Year	Mean	SD	Toal	Mean	SD	Toal
1	Dai	2021	42.84	10.44	20	41.94	10.98	30
2	Song	2012	88.5	22.6	20	85.3	18	20

## Sheet:  Cholesterol
		Experimental				Control
Number	First Author	Year	Mean	SD	Toal	Mean	SD	Toal
1	Dai	2021	75.42	13.5	20	73.8	15.12	30
2	Song	2012	163.8	31	20	157.9	27	20

## Sheet: Urea clearance index
		Experimental				Control
Number	First Author	Year	Mean	SD	Toal	Mean	SD	Toal
1	Chemma	2007	1.6	0.9	24	1.8	1.1	25
2	Dai	2021	1.4	0.27	20	1.47	0.27	30
